# Supplementary material
Source: publisher figshare collection journal article supplement (https://gsapubs.figshare.com/articles/dataset/_/19176242)
Supplement: Supplementary file 1 [file 34070657]

## Supplemental Material

### Stagnation and tearing of the subducting northwest Pacific slab

Muchen Sun<sup>1</sup>, Youqiang Yu<sup>1\*</sup>, Stephen S. Gao<sup>2</sup> and Kelly H. Liu<sup>2</sup>

<sup>1</sup>State Key Laboratory of Marine Geology, Tongji University, Shanghai 200092, China. Email: [yuyouqiang@tongji.edu.cn](mailto:yuyouqiang@tongji.edu.cn)

<sup>2</sup>Geology and Geophysics Program, Missouri University of Science and Technology, Rolla, MO 65409, USA

\*Corresponding author: Youqiang Yu ([yuyouqiang@tongji.edu.cn](mailto:yuyouqiang@tongji.edu.cn))

#### Introduction

This document contains detailed descriptions of the data and methods utilized to obtain the results presented in the paper, as well as Supplementary Figure DR1 and Table DR1. This material is associated with Sun et al., *Slab stagnation and tearing of the subducting Northwest Pacific plate*.

#### Data

All the broadband seismic data used in this study were obtained from the Data Management Center (DMC) of the Incorporated Research Institutions for Seismology (IRIS; <https://ds.iris.edu/ds/nodes/dmc>) and the Data Management Center of China National Seismic Network at Institute of Geophysics, China Earthquake Administration (SEISDMC; <http://www.seisdmc.ac.cn>; Zheng et al., 2010). We requested all the available three-component broadband teleseismic data recorded by 381 stations in the area (120°E to 145°E, and 29°N to 50°N), which is slightly larger than our study area (125°E to 145°E, and 30°N to 48°N), to ensure the reliability of the results at the edges. The recording duration of these seismic data is from mid-1986 to January-2021. To achieve an optimal balance between the quality and quantity of the requested data, an empirical equation of the variable cutoff magnitude ( $M_c$ ) was used, which can be expressed as  $M_c = 5.2 + (\Delta - 30.0)/(180.0 - 30.0) - D/700.0$ . Here, the  $\Delta$  represents the epicentral distance ranging from 30° to 100°, while the  $D$  is focal depth in kilometer.

## Method

All the details about the data processing procedure, including data selection, pre-processing, moveout correction, and stacking under a non-plane-wave assumption, are similar to those in the previous study for the contiguous United States (Gao and Liu, 2014a). We applied a four-pole, two-pass bandpass Bessel filter with corner frequencies 0.02 and 0.2 Hz to keep the low-frequency signals and enhance the signal-to-noise ratio (SNR) of the seismograms. Then the SNR-based procedures (Gao and Liu, 2014a) were utilized to reject seismograms with the P-wave first-arrival SNR on the vertical component less than 4.0. The SNR is defined as  $\max |A_s| / |\bar{A}_n|$ , where  $\max |A_s|$  is the maximum absolute amplitude on the vertical seismogram 8 s before and 17 s after the predicted IASP91 arrival time for the first P-wave, and  $|\bar{A}_n|$  is the mean absolute amplitude in the time window of 10–20 s before the predicted P-wave arrival time. Following the deconvolution procedure of Ammon (1991), all the filtered high-quality seismograms were converted into the radial receiver functions (RFs). To further improve the accuracy of the resulting RFs, we visually verified to remove the ones with abnormal arrivals or no clear first P pulse. After all these processes, a total of 139,740 RFs from 9,870 events were finally selected for the RF investigation.

Before stacking the RFs, the IASP91 Earth model was employed to ray-trace the path of the converted phase (Pds) and calculate the theoretical coordinates of the ray-piercing points at the middle of the MTZ (535 km). Then we stacked all the RFs with piercing points in each of the radius= $1^\circ$  circular bins to generate a depth series. Considering the size of the first Fresnel zone of shear waves at the MTZ depth, the distance between the centers of adjacent bins is set to  $1^\circ$ , and therefore, there is an overlap among neighboring bins. Bins with less than 8 RFs were not used. The mean and standard deviation of the MTZ discontinuity depths and MTZ thickness in each bin were determined following a bootstrap resampling procedure with 50 resampling iterations (Efron and Tibshirani, 1986). For each bootstrap iteration, 1- $1/e=63\%$  independent RFs were chosen randomly. About 60% of the chosen ones were then duplicated so that the total number of the new set of RFs is the same as that of the original set. The depths of the d410 and d660 were obtained by picking the maximum stacking amplitude on the resulting depth series in a predefined depth window, which ranges from 380 to 440 km for the d410, and from 630 to 690 km for the d660 with a vertical grid size of 1 km. For a small portion of the traces that have multiple arrivals with comparable amplitudes (e.g., Figure DR1) that might be caused by the P-

to-S conversions from the subducted slab boundaries in the possible ranges of MTZ discontinuities, the depth window was adjusted by considering the recent seismic tomography results in the upper mantle and MTZ, and the determined depth in the neighboring bins.

Since the RFs were moveout-corrected utilizing the 1-D IASP91 Earth model, the resulting MTZ discontinuity depths are apparent rather than true depths. To reliably convert the apparent depths into true depths, well-determined 3-D velocity models for both  $V_p$  and  $V_s$  with sufficient spatial resolution for the crust, upper mantle, and MTZ, are required. In this study we use TX2019slab, which is a global  $V_p$  and  $V_s$  model (Lu et al., 2019), to conduct velocity corrections based on the procedure proposed by Gao and Liu (2014b). To perform the correction, the velocity anomalies are smoothed using the cubic B-spline function, and the average P- and S-wave velocities are calculated in radius =  $1^\circ$  cylinders with a 10 km thickness for the depth range of 0–700 km. Lastly, we convert the apparent depths ( $H_A$ ) into the true depths ( $H_T$ ) using the equation  $H_T = \frac{(V_{s0} + \delta V_s) \times (V_{p0} + \delta V_p)}{V_{p0} + \delta V_p - V_{s0} - \delta V_s} \times \frac{V_{p0} - V_{s0}}{V_{p0} \times V_{s0}} H_A$ , where  $V_{p0}$  and  $V_{s0}$  are the mean P- and S-velocity in the layer in the standard Earth model, and  $\delta V_p$  and  $\delta V_s$  are the absolute P- and S-wave velocity anomalies. The spatially continuous images of the discontinuity depths and MTZ thickness were obtained using a continuous curvature surface gridding algorithm with a tension factor of 0.5 (Smith and Wessel, 1990).

## Supplemental References

- Ammon, C.J., 1991. The isolation of receiver effects from teleseismic P waveforms. *Bulletin- Seismological Society of America*, v. 81, p. 2504-2510.
- Chen, C., Zhao, D., Tian, Y., Wu, S., Hasegawa, A., Lei, J., Park, J.H. and Kang, I.B., 2017. Mantle transition zone, stagnant slab and intraplate volcanism in Northeast Asia. *Geophysical Journal International*, v. 209, p. 68-85. <https://doi.org/10.1093/gji/ggw491>.
- Efron, B. and Tibshirani, R., 1986. Bootstrap methods for standard errors, confidence intervals, and other measures of statistical accuracy. *Statistical science*, p. 54-75. <https://doi.org/10.1016/j.epsl.2018.09.012>.
- Gao, S.S. and Liu, K.H., 2014a. Mantle transition zone discontinuities beneath the contiguous United States. *Journal of Geophysical Research: Solid Earth*, v. 119, p. 6452-6468. <https://doi.org/10.1002/2014JB011253>

- Gao, S.S. and Liu, K.H., 2014b. Imaging mantle discontinuities using multiply-reflected P-to-S conversions. *Earth and Planetary Science Letters*, v. 402, p. 99-106.  
<https://doi.org/10.1016/j.epsl.2013.08.025>.
- Lu, C., Grand, S.P., Lai, H. and Garnero, E.J., 2019. TX2019slab: A new P and S tomography model incorporating subducting slabs. *Journal of Geophysical Research: Solid Earth*, v. 124, p. 11549-11567. <https://doi.org/10.1029/2019JB017448>.
- Smith, W.H.F. and Wessel, P., 1990. Gridding with continuous curvature splines in tension. *Geophysics*, v. 55, p. 293-305. <https://doi.org/10.1190/1.1442837>.
- Zheng, X.F., Yao, Z.X., Liang, J.H., and Zheng, J., 2010. The role played and opportunities provided by IGP DMC of China National Seismic Network in Wenchuan earthquake disaster relief and researches. *Bulletin of the Seismological Society of America*, v. 100, p. 2866–2872. <https://doi.org/10.1785/0120090257>.

## Supplementary Figure and Table

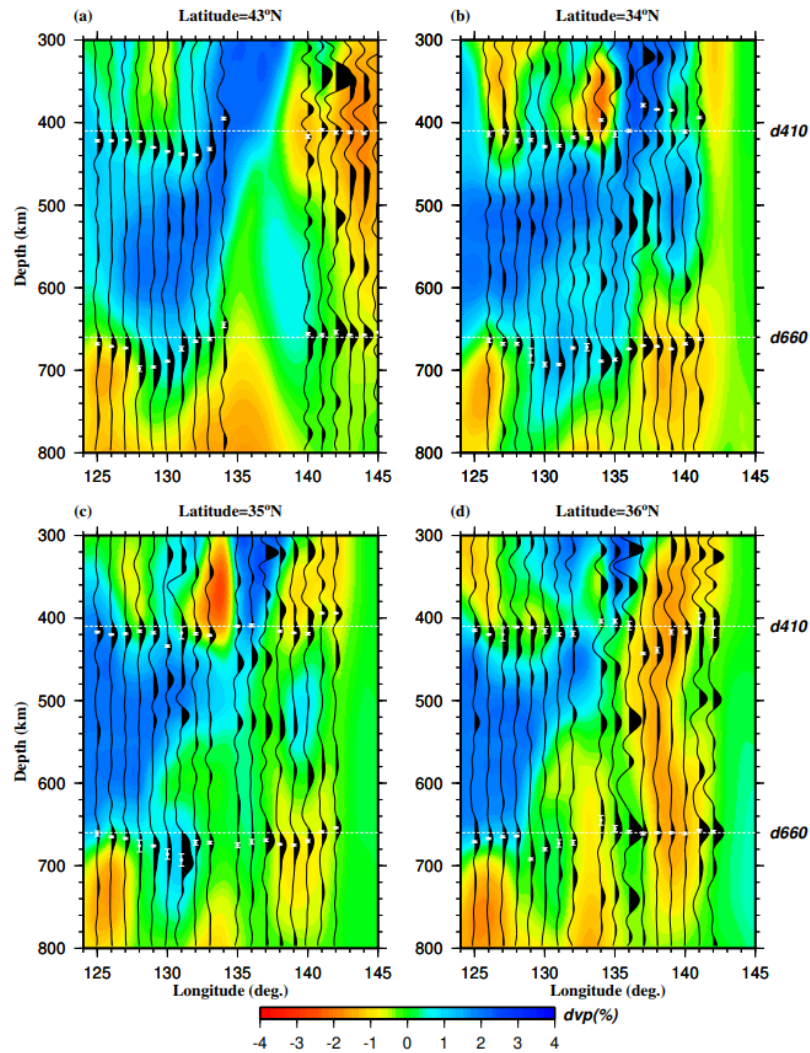

**Figure S1.** (a) Stacked receiver functions along 43°N latitude with the picked MTZ discontinuity peaks (white dots with error bars). (b), (c) and (d) are same as (a) but for the 34°N, 35°N and 36°N, respectively. The background image shows P-wave velocity anomalies (Chen et al., 2017).

**Table S1.** Results of receiver function stacking for each bin. The columns are:

clon: longitude of the circle's center

clat: latitude of the circle's center

d410: depth of the d410 (km)

d410\_SD: Standard deviation of the d410 depth (km)

d660: depth of the d660 (km)

d660\_SD: Standard deviation of the d660 depth (km)

MTZ: Mantle Transition Zone thickness (km)

cd410: depth of the d410 corrected by TX2019slab model (km)

cd660: depth of the d660 corrected by TX2019slab model (km)

cMTZ: Mantle Transition Zone thickness corrected by TX2019slab (km)

Note that a value of zero is given to the depth if the Pds arrival is not well-defined.

| clon | clat | d410 | d410_SD | d660 | d660_SD | MTZ | cd410 | cd660 | cMTZ |
|------|------|------|---------|------|---------|-----|-------|-------|------|
| 125  | 48   | 404  | 0.9     | 674  | 0.6     | 269 | 407   | 680   | 273  |
| 125  | 47   | 407  | 0.5     | 673  | 0.7     | 265 | 409   | 678   | 269  |
| 126  | 48   | 408  | 1.0     | 674  | 0.9     | 266 | 410   | 679   | 269  |
| 125  | 46   | 412  | 1.0     | 667  | 1.1     | 254 | 414   | 671   | 257  |
| 126  | 47   | 411  | 0.9     | 676  | 0.8     | 265 | 413   | 681   | 268  |
| 127  | 48   | 413  | 1.0     | 673  | 0.7     | 260 | 414   | 678   | 263  |
| 125  | 45   | 419  | 1.5     | 660  | 0.8     | 240 | 420   | 664   | 244  |
| 126  | 46   | 417  | 0.8     | 670  | 1.1     | 252 | 418   | 674   | 256  |
| 127  | 47   | 415  | 0.6     | 678  | 0.8     | 262 | 416   | 681   | 266  |
| 125  | 44   | 411  | 1.1     | 664  | 1.0     | 253 | 411   | 668   | 256  |
| 128  | 48   | 415  | 0.7     | 673  | 0.7     | 257 | 415   | 677   | 262  |
| 126  | 45   | 422  | 0.9     | 666  | 1.4     | 244 | 422   | 669   | 247  |
| 127  | 46   | 419  | 1.4     | 682  | 1.7     | 263 | 419   | 685   | 266  |
| 125  | 43   | 422  | 1.2     | 668  | 1.4     | 246 | 422   | 672   | 250  |
| 128  | 47   | 417  | 0.7     | 675  | 0.6     | 257 | 416   | 678   | 261  |
| 129  | 48   | 418  | 1.2     | 669  | 1.1     | 250 | 416   | 672   | 255  |
| 126  | 44   | 414  | 0.9     | 666  | 0.9     | 252 | 414   | 669   | 255  |
| 127  | 45   | 417  | 0.7     | 674  | 2.3     | 256 | 416   | 676   | 260  |
| 125  | 42   | 415  | 0.5     | 667  | 0.8     | 251 | 414   | 670   | 256  |
| 128  | 46   | 418  | 0.5     | 678  | 0.9     | 260 | 417   | 680   | 263  |
| 129  | 47   | 418  | 0.7     | 673  | 0.5     | 254 | 416   | 675   | 259  |
| 130  | 48   | 415  | 1.7     | 663  | 2.0     | 247 | 412   | 665   | 253  |
| 126  | 43   | 422  | 0.6     | 671  | 0.6     | 248 | 421   | 674   | 253  |

|     |    |     |     |     |     |     |     |     |     |
|-----|----|-----|-----|-----|-----|-----|-----|-----|-----|
| 127 | 44 | 416 | 0.8 | 673 | 1.3 | 257 | 415 | 675 | 260 |
| 125 | 41 | 412 | 0.5 | 664 | 0.7 | 251 | 409 | 666 | 257 |
| 128 | 45 | 417 | 0.7 | 683 | 1.2 | 266 | 415 | 684 | 269 |
| 129 | 46 | 419 | 0.7 | 675 | 0.7 | 256 | 417 | 677 | 260 |
| 130 | 47 | 416 | 0.6 | 666 | 1.0 | 249 | 413 | 668 | 255 |
| 131 | 48 | 421 | 3.9 | 662 | 1.8 | 240 | 417 | 663 | 246 |
| 126 | 42 | 419 | 0.9 | 670 | 0.6 | 251 | 417 | 672 | 255 |
| 127 | 43 | 421 | 0.6 | 673 | 0.9 | 252 | 419 | 675 | 256 |
| 128 | 44 | 417 | 1.2 | 691 | 1.4 | 273 | 415 | 692 | 278 |
| 125 | 40 | 413 | 0.4 | 661 | 0.5 | 247 | 409 | 662 | 253 |
| 129 | 45 | 417 | 0.4 | 679 | 0.8 | 261 | 414 | 680 | 266 |
| 130 | 46 | 419 | 0.5 | 669 | 0.6 | 250 | 416 | 671 | 255 |
| 132 | 48 | 430 | 2.1 | 664 | 2.2 | 233 | 425 | 664 | 239 |
| 131 | 47 | 412 | 0.5 | 663 | 0.6 | 250 | 408 | 665 | 257 |
| 126 | 41 | 416 | 0.8 | 670 | 0.7 | 253 | 413 | 671 | 259 |
| 127 | 42 | 422 | 0.7 | 670 | 0.5 | 248 | 419 | 672 | 252 |
| 128 | 43 | 423 | 0.7 | 698 | 3.3 | 275 | 420 | 699 | 279 |
| 125 | 39 | 416 | 0.7 | 662 | 0.2 | 245 | 412 | 663 | 252 |
| 129 | 44 | 418 | 0.8 | 690 | 1.6 | 272 | 415 | 692 | 277 |
| 133 | 48 | 422 | 1.9 | 668 | 1.2 | 246 | 416 | 668 | 252 |
| 130 | 45 | 418 | 0.5 | 669 | 0.4 | 251 | 414 | 670 | 256 |
| 132 | 47 | 411 | 0.7 | 663 | 0.7 | 251 | 406 | 664 | 258 |
| 131 | 46 | 418 | 0.6 | 664 | 0.5 | 246 | 414 | 666 | 252 |
| 126 | 40 | 427 | 4.7 | 666 | 0.8 | 238 | 423 | 667 | 244 |
| 127 | 41 | 424 | 0.8 | 671 | 0.5 | 246 | 421 | 672 | 251 |
| 128 | 42 | 425 | 0.5 | 701 | 1.3 | 276 | 421 | 702 | 280 |
| 125 | 38 | 421 | 0.7 | 665 | 1.0 | 243 | 416 | 666 | 250 |
| 134 | 48 | 418 | 1.0 | 668 | 1.3 | 249 | 412 | 668 | 256 |
| 129 | 43 | 430 | 0.5 | 696 | 1.0 | 266 | 426 | 697 | 271 |
| 133 | 47 | 414 | 0.9 | 664 | 1.0 | 249 | 408 | 665 | 257 |
| 130 | 44 | 419 | 0.7 | 677 | 0.9 | 257 | 415 | 678 | 264 |
| 132 | 46 | 418 | 0.8 | 664 | 0.4 | 245 | 413 | 666 | 253 |
| 131 | 45 | 421 | 0.6 | 666 | 0.2 | 245 | 417 | 667 | 251 |
| 126 | 39 | 428 | 2.8 | 663 | 0.5 | 235 | 423 | 664 | 240 |
| 127 | 40 | 426 | 0.9 | 669 | 0.7 | 243 | 422 | 669 | 248 |
| 135 | 48 | 416 | 1.3 | 669 | 1.5 | 253 | 411 | 670 | 259 |
| 128 | 41 | 429 | 0.5 | 691 | 1.4 | 261 | 425 | 691 | 266 |
| 134 | 47 | 419 | 1.5 | 664 | 1.1 | 245 | 413 | 666 | 253 |
| 125 | 37 | 418 | 1.7 | 674 | 1.2 | 256 | 412 | 674 | 262 |
| 129 | 42 | 427 | 0.6 | 703 | 0.9 | 275 | 423 | 703 | 281 |
| 133 | 46 | 420 | 0.5 | 664 | 0.4 | 244 | 415 | 666 | 251 |

|     |    |     |     |     |     |     |     |     |     |
|-----|----|-----|-----|-----|-----|-----|-----|-----|-----|
| 130 | 43 | 435 | 0.8 | 689 | 1.0 | 254 | 430 | 690 | 260 |
| 132 | 45 | 423 | 0.5 | 665 | 0.5 | 242 | 418 | 666 | 248 |
| 131 | 44 | 424 | 0.9 | 668 | 0.6 | 243 | 419 | 669 | 250 |
| 126 | 38 | 423 | 1.2 | 671 | 0.7 | 247 | 418 | 671 | 254 |
| 136 | 48 | 413 | 1.4 | 674 | 1.8 | 261 | 408 | 675 | 267 |
| 127 | 39 | 427 | 2.1 | 665 | 0.9 | 238 | 422 | 665 | 243 |
| 135 | 47 | 416 | 1.3 | 662 | 1.7 | 246 | 411 | 664 | 253 |
| 128 | 40 | 428 | 0.8 | 671 | 0.9 | 243 | 423 | 670 | 248 |
| 134 | 46 | 421 | 4.5 | 664 | 0.9 | 242 | 416 | 665 | 248 |
| 125 | 36 | 415 | 1.3 | 671 | 1.2 | 255 | 408 | 670 | 262 |
| 133 | 45 | 422 | 0.8 | 665 | 0.5 | 242 | 417 | 667 | 250 |
| 129 | 41 | 429 | 0.6 | 696 | 1.1 | 266 | 424 | 696 | 272 |
| 132 | 44 | 425 | 1.1 | 666 | 0.5 | 241 | 420 | 667 | 247 |
| 130 | 42 | 432 | 1.1 | 702 | 1.5 | 270 | 427 | 702 | 275 |
| 131 | 43 | 438 | 1.1 | 674 | 2.8 | 236 | 433 | 675 | 242 |
| 137 | 48 | 420 | 3.7 | 673 | 2.2 | 253 | 416 | 675 | 259 |
| 126 | 37 | 419 | 2.6 | 677 | 4.1 | 257 | 412 | 677 | 264 |
| 136 | 47 | 418 | 2.5 | 666 | 1.3 | 247 | 414 | 669 | 255 |
| 127 | 38 | 416 | 5.6 | 685 | 4.0 | 268 | 410 | 685 | 275 |
| 135 | 46 | 438 | 1.6 | 664 | 2.5 | 226 | 434 | 665 | 230 |
| 134 | 45 | 418 | 1.8 | 665 | 0.7 | 247 | 413 | 666 | 253 |
| 128 | 39 | 427 | 1.4 | 661 | 1.2 | 234 | 421 | 661 | 239 |
| 133 | 44 | 425 | 0.6 | 666 | 0.7 | 240 | 419 | 667 | 248 |
| 125 | 35 | 417 | 1.1 | 661 | 3.1 | 244 | 409 | 660 | 250 |
| 129 | 40 | 432 | 0.6 | 686 | 4.8 | 253 | 426 | 686 | 259 |
| 132 | 43 | 439 | 0.6 | 665 | 1.1 | 225 | 433 | 665 | 232 |
| 130 | 41 | 427 | 0.6 | 694 | 0.8 | 266 | 421 | 693 | 272 |
| 131 | 42 | 419 | 1.0 | 667 | 1.6 | 247 | 413 | 667 | 254 |
| 137 | 47 | 437 | 4.1 | 663 | 3.4 | 226 | 434 | 667 | 233 |
| 126 | 36 | 420 | 0.8 | 667 | 1.1 | 247 | 413 | 666 | 253 |
| 136 | 46 | 434 | 5.0 | 657 | 5.4 | 223 | 432 | 659 | 227 |
| 139 | 48 | 411 | 1.9 | 654 | 3.0 | 242 | 408 | 656 | 248 |
| 135 | 45 | 414 | 3.8 | 670 | 3.2 | 256 | 411 | 671 | 261 |
| 127 | 37 | 0   | 0.0 | 664 | 0.6 | 0   | 0   | 663 | 0   |
| 134 | 44 | 415 | 1.2 | 668 | 1.1 | 252 | 410 | 668 | 259 |
| 128 | 38 | 413 | 7.4 | 657 | 1.2 | 244 | 406 | 656 | 250 |
| 133 | 43 | 432 | 1.6 | 662 | 1.8 | 229 | 426 | 663 | 236 |
| 129 | 39 | 416 | 4.3 | 661 | 2.9 | 245 | 410 | 661 | 251 |
| 132 | 42 | 419 | 7.7 | 660 | 1.4 | 240 | 412 | 659 | 247 |
| 130 | 40 | 433 | 2.1 | 683 | 6.6 | 249 | 427 | 682 | 256 |
| 131 | 41 | 421 | 1.1 | 674 | 1.7 | 253 | 414 | 673 | 258 |



|     |    |     |     |     |     |     |     |     |     |
|-----|----|-----|-----|-----|-----|-----|-----|-----|-----|
| 140 | 48 | 415 | 4.3 | 660 | 0.0 | 244 | 412 | 663 | 250 |
| 136 | 45 | 430 | 1.4 | 663 | 5.5 | 233 | 429 | 666 | 237 |
| 126 | 35 | 420 | 0.8 | 665 | 0.9 | 245 | 412 | 663 | 251 |
| 139 | 47 | 413 | 6.1 | 656 | 1.5 | 242 | 411 | 662 | 251 |
| 135 | 44 | 422 | 4.6 | 678 | 1.7 | 256 | 419 | 679 | 260 |
| 127 | 36 | 420 | 7.8 | 665 | 1.2 | 245 | 412 | 663 | 251 |
| 141 | 48 | 414 | 3.3 | 654 | 1.5 | 239 | 411 | 658 | 247 |
| 134 | 43 | 395 | 1.5 | 645 | 3.3 | 249 | 389 | 645 | 256 |
| 128 | 37 | 410 | 1.0 | 664 | 0.9 | 254 | 403 | 663 | 260 |
| 133 | 42 | 436 | 2.0 | 655 | 2.6 | 218 | 430 | 654 | 225 |
| 129 | 38 | 413 | 4.7 | 659 | 0.8 | 246 | 406 | 659 | 253 |
| 132 | 41 | 423 | 6.4 | 664 | 3.7 | 241 | 416 | 662 | 246 |
| 130 | 39 | 430 | 2.6 | 663 | 2.1 | 233 | 423 | 663 | 239 |
| 131 | 40 | 422 | 1.9 | 670 | 1.6 | 248 | 415 | 668 | 253 |
| 140 | 47 | 417 | 2.9 | 655 | 1.1 | 237 | 416 | 661 | 246 |
| 142 | 48 | 395 | 6.7 | 651 | 1.6 | 255 | 392 | 655 | 263 |
| 139 | 46 | 419 | 7.5 | 660 | 1.1 | 241 | 420 | 667 | 247 |
| 126 | 34 | 414 | 2.9 | 664 | 2.3 | 249 | 406 | 662 | 256 |
| 141 | 47 | 418 | 2.0 | 659 | 1.2 | 241 | 417 | 666 | 249 |
| 127 | 35 | 419 | 0.8 | 667 | 1.1 | 247 | 410 | 665 | 254 |
| 143 | 48 | 0   | 0.0 | 649 | 2.1 | 0   | 0   | 652 | 0   |
| 128 | 36 | 411 | 0.9 | 664 | 1.0 | 252 | 403 | 662 | 259 |
| 133 | 41 | 416 | 2.4 | 670 | 5.8 | 253 | 409 | 669 | 260 |
| 132 | 40 | 415 | 2.2 | 660 | 3.7 | 245 | 408 | 658 | 250 |
| 129 | 37 | 414 | 1.2 | 663 | 0.9 | 249 | 407 | 663 | 256 |
| 140 | 46 | 424 | 1.5 | 667 | 1.1 | 243 | 427 | 675 | 249 |
| 130 | 38 | 418 | 2.1 | 665 | 2.8 | 247 | 411 | 665 | 254 |
| 125 | 32 | 404 | 1.4 | 665 | 3.6 | 261 | 396 | 663 | 267 |
| 142 | 47 | 398 | 4.3 | 653 | 2.1 | 254 | 396 | 659 | 263 |
| 144 | 48 | 414 | 4.0 | 649 | 1.1 | 235 | 410 | 652 | 242 |
| 139 | 45 | 412 | 3.1 | 685 | 2.1 | 273 | 414 | 692 | 278 |
| 141 | 46 | 419 | 1.3 | 671 | 2.1 | 252 | 422 | 680 | 258 |
| 145 | 48 | 415 | 2.8 | 653 | 1.8 | 238 | 412 | 657 | 245 |
| 143 | 47 | 432 | 2.2 | 657 | 3.9 | 224 | 432 | 663 | 231 |
| 127 | 34 | 411 | 2.8 | 668 | 1.8 | 256 | 402 | 666 | 263 |
| 128 | 35 | 416 | 1.2 | 676 | 7.2 | 260 | 407 | 674 | 266 |
| 140 | 45 | 419 | 2.0 | 667 | 5.6 | 247 | 422 | 675 | 253 |
| 129 | 36 | 412 | 0.8 | 692 | 1.4 | 279 | 404 | 692 | 288 |
| 131 | 38 | 434 | 3.3 | 662 | 2.1 | 227 | 427 | 662 | 235 |
| 130 | 37 | 418 | 2.6 | 673 | 3.4 | 254 | 411 | 674 | 263 |
| 142 | 46 | 420 | 0.9 | 671 | 1.2 | 250 | 423 | 680 | 257 |

|     |    |     |     |     |     |     |     |     |     |
|-----|----|-----|-----|-----|-----|-----|-----|-----|-----|
| 144 | 47 | 428 | 1.0 | 653 | 1.0 | 225 | 428 | 659 | 231 |
| 139 | 44 | 444 | 1.3 | 682 | 5.7 | 237 | 446 | 688 | 242 |
| 141 | 45 | 419 | 1.7 | 675 | 2.7 | 255 | 423 | 684 | 261 |
| 145 | 47 | 429 | 3.3 | 660 | 4.0 | 231 | 431 | 667 | 236 |
| 143 | 46 | 422 | 0.5 | 654 | 0.7 | 232 | 425 | 662 | 237 |
| 127 | 33 | 429 | 2.9 | 677 | 4.3 | 247 | 421 | 675 | 254 |
| 140 | 44 | 443 | 1.2 | 685 | 3.8 | 242 | 447 | 693 | 246 |
| 128 | 34 | 422 | 2.3 | 668 | 1.7 | 246 | 414 | 666 | 252 |
| 129 | 35 | 418 | 1.4 | 676 | 1.1 | 258 | 410 | 675 | 265 |
| 131 | 37 | 423 | 1.6 | 712 | 2.3 | 289 | 416 | 713 | 298 |
| 142 | 45 | 418 | 1.0 | 667 | 4.9 | 248 | 422 | 676 | 254 |
| 130 | 36 | 416 | 2.7 | 680 | 1.8 | 264 | 408 | 681 | 273 |
| 144 | 46 | 422 | 0.5 | 653 | 0.6 | 230 | 426 | 661 | 235 |
| 125 | 30 | 405 | 1.6 | 684 | 5.3 | 279 | 398 | 683 | 285 |
| 141 | 44 | 438 | 9.4 | 685 | 5.1 | 247 | 443 | 694 | 251 |
| 145 | 46 | 421 | 0.5 | 651 | 0.6 | 229 | 426 | 660 | 234 |
| 143 | 45 | 418 | 0.7 | 655 | 1.3 | 237 | 423 | 664 | 241 |
| 140 | 43 | 417 | 2.3 | 656 | 1.7 | 239 | 421 | 664 | 243 |
| 132 | 37 | 420 | 2.6 | 710 | 1.9 | 289 | 413 | 712 | 299 |
| 142 | 44 | 398 | 2.6 | 656 | 9.3 | 258 | 403 | 665 | 262 |
| 128 | 33 | 426 | 3.3 | 668 | 3.7 | 242 | 418 | 666 | 248 |
| 144 | 45 | 421 | 0.5 | 654 | 0.7 | 232 | 427 | 663 | 237 |
| 131 | 36 | 420 | 2.2 | 673 | 4.5 | 253 | 413 | 674 | 261 |
| 129 | 34 | 421 | 1.8 | 682 | 8.8 | 261 | 413 | 680 | 268 |
| 130 | 35 | 434 | 1.2 | 686 | 6.2 | 251 | 426 | 686 | 260 |
| 141 | 43 | 409 | 1.3 | 657 | 1.5 | 248 | 413 | 665 | 252 |
| 145 | 45 | 416 | 3.5 | 671 | 4.8 | 255 | 422 | 681 | 259 |
| 143 | 44 | 400 | 1.9 | 662 | 1.0 | 262 | 406 | 671 | 266 |
| 140 | 42 | 411 | 2.2 | 668 | 4.5 | 256 | 415 | 676 | 261 |
| 142 | 43 | 412 | 2.0 | 654 | 2.4 | 242 | 417 | 663 | 245 |
| 144 | 44 | 401 | 0.9 | 656 | 0.6 | 255 | 407 | 665 | 258 |
| 132 | 36 | 419 | 3.3 | 672 | 2.9 | 252 | 412 | 674 | 262 |
| 128 | 32 | 411 | 5.7 | 668 | 1.4 | 256 | 403 | 666 | 263 |
| 131 | 35 | 418 | 7.3 | 693 | 7.3 | 274 | 411 | 694 | 283 |
| 130 | 34 | 429 | 1.3 | 693 | 2.5 | 263 | 421 | 693 | 271 |
| 129 | 33 | 414 | 2.6 | 678 | 6.8 | 263 | 406 | 676 | 270 |
| 139 | 41 | 0   | 0.0 | 661 | 4.9 | 0   | 0   | 669 | 0   |
| 141 | 42 | 409 | 1.1 | 660 | 3.9 | 251 | 413 | 668 | 255 |
| 145 | 44 | 0   | 0.0 | 661 | 1.4 | 0   | 0   | 670 | 0   |
| 143 | 43 | 412 | 1.3 | 657 | 0.5 | 244 | 418 | 666 | 248 |
| 135 | 38 | 420 | 6.1 | 678 | 4.7 | 257 | 416 | 679 | 263 |

|     |    |     |     |     |     |     |     |     |     |
|-----|----|-----|-----|-----|-----|-----|-----|-----|-----|
| 138 | 40 | 419 | 4.6 | 664 | 4.9 | 244 | 421 | 669 | 248 |
| 134 | 37 | 0   | 0.0 | 665 | 3.5 | 0   | 0   | 666 | 0   |
| 140 | 41 | 417 | 4.5 | 680 | 2.0 | 262 | 422 | 688 | 266 |
| 137 | 39 | 0   | 0.0 | 680 | 2.9 | 0   | 0   | 683 | 0   |
| 142 | 42 | 409 | 1.2 | 658 | 7.8 | 249 | 412 | 664 | 252 |
| 144 | 43 | 413 | 0.8 | 657 | 0.6 | 244 | 419 | 665 | 246 |
| 132 | 35 | 419 | 1.3 | 672 | 2.9 | 252 | 413 | 675 | 261 |
| 131 | 34 | 428 | 1.5 | 693 | 1.2 | 264 | 423 | 695 | 272 |
| 139 | 40 | 0   | 0.0 | 662 | 2.9 | 0   | 0   | 669 | 0   |
| 136 | 38 | 423 | 1.2 | 677 | 3.6 | 254 | 421 | 680 | 258 |
| 128 | 31 | 402 | 3.1 | 649 | 5.0 | 247 | 394 | 647 | 253 |
| 130 | 33 | 423 | 3.3 | 686 | 1.2 | 262 | 417 | 686 | 269 |
| 129 | 32 | 421 | 5.6 | 675 | 1.8 | 254 | 413 | 674 | 260 |
| 141 | 41 | 391 | 1.9 | 0   | 0.0 | 0   | 395 | 0   | 0   |
| 145 | 43 | 0   | 0.0 | 654 | 0.5 | 0   | 0   | 660 | 0   |
| 143 | 42 | 413 | 1.5 | 664 | 2.5 | 250 | 415 | 669 | 254 |
| 135 | 37 | 422 | 1.4 | 644 | 6.6 | 222 | 420 | 646 | 227 |
| 138 | 39 | 410 | 5.4 | 679 | 3.4 | 268 | 411 | 683 | 272 |
| 134 | 36 | 404 | 2.2 | 645 | 5.8 | 241 | 398 | 646 | 248 |
| 140 | 40 | 413 | 1.9 | 663 | 1.7 | 250 | 418 | 671 | 253 |
| 144 | 42 | 415 | 1.0 | 663 | 2.0 | 248 | 416 | 666 | 250 |
| 142 | 41 | 395 | 1.2 | 0   | 0.0 | 0   | 396 | 0   | 0   |
| 137 | 38 | 422 | 2.7 | 683 | 2.2 | 261 | 422 | 686 | 265 |
| 133 | 35 | 421 | 0.9 | 672 | 1.6 | 251 | 416 | 676 | 260 |
| 132 | 34 | 418 | 1.5 | 673 | 1.3 | 254 | 414 | 677 | 262 |
| 139 | 39 | 407 | 1.5 | 661 | 1.8 | 253 | 410 | 667 | 257 |
| 136 | 37 | 421 | 1.0 | 649 | 1.9 | 227 | 420 | 652 | 232 |
| 131 | 33 | 432 | 3.5 | 687 | 2.7 | 254 | 431 | 692 | 261 |
| 141 | 40 | 399 | 5.2 | 656 | 4.8 | 256 | 404 | 664 | 260 |
| 130 | 32 | 414 | 8.4 | 677 | 1.5 | 263 | 409 | 679 | 270 |
| 143 | 41 | 395 | 1.4 | 0   | 0.0 | 0   | 395 | 0   | 0   |
| 128 | 30 | 404 | 1.7 | 648 | 4.5 | 244 | 399 | 648 | 249 |
| 129 | 31 | 404 | 2.6 | 674 | 1.7 | 270 | 398 | 674 | 277 |
| 135 | 36 | 404 | 2.4 | 655 | 3.6 | 250 | 401 | 658 | 257 |
| 138 | 38 | 431 | 2.7 | 669 | 4.6 | 237 | 431 | 672 | 241 |
| 140 | 39 | 409 | 1.1 | 662 | 2.1 | 252 | 413 | 669 | 256 |
| 142 | 40 | 399 | 2.7 | 655 | 3.3 | 256 | 401 | 660 | 259 |
| 137 | 37 | 425 | 2.1 | 659 | 1.9 | 233 | 425 | 662 | 238 |
| 133 | 34 | 419 | 1.3 | 672 | 4.3 | 253 | 412 | 673 | 261 |
| 139 | 38 | 412 | 1.0 | 661 | 0.8 | 248 | 414 | 666 | 252 |
| 132 | 33 | 402 | 0.8 | 683 | 6.1 | 280 | 396 | 684 | 288 |

|     |    |     |     |     |     |     |     |     |     |
|-----|----|-----|-----|-----|-----|-----|-----|-----|-----|
| 136 | 36 | 409 | 5.2 | 659 | 1.8 | 250 | 407 | 662 | 255 |
| 141 | 39 | 406 | 1.2 | 657 | 1.8 | 251 | 411 | 664 | 254 |
| 143 | 40 | 403 | 0.9 | 654 | 2.0 | 250 | 404 | 657 | 253 |
| 131 | 32 | 419 | 2.5 | 679 | 1.4 | 260 | 417 | 684 | 267 |
| 130 | 31 | 413 | 3.2 | 684 | 7.7 | 270 | 411 | 689 | 278 |
| 129 | 30 | 406 | 1.5 | 643 | 2.3 | 237 | 404 | 646 | 243 |
| 135 | 35 | 410 | 0.7 | 675 | 3.0 | 265 | 406 | 678 | 272 |
| 138 | 37 | 424 | 4.0 | 660 | 1.4 | 236 | 425 | 664 | 239 |
| 140 | 38 | 410 | 0.8 | 659 | 1.0 | 248 | 414 | 666 | 252 |
| 142 | 39 | 406 | 0.9 | 654 | 1.2 | 247 | 409 | 659 | 250 |
| 134 | 34 | 397 | 1.5 | 689 | 1.1 | 291 | 390 | 691 | 301 |
| 137 | 36 | 443 | 1.2 | 661 | 1.5 | 218 | 444 | 665 | 221 |
| 133 | 33 | 402 | 1.4 | 689 | 2.7 | 286 | 394 | 688 | 294 |
| 139 | 37 | 415 | 1.0 | 661 | 1.0 | 245 | 417 | 666 | 249 |
| 141 | 38 | 410 | 0.8 | 658 | 1.0 | 248 | 414 | 664 | 251 |
| 143 | 39 | 401 | 1.9 | 652 | 3.3 | 251 | 403 | 656 | 253 |
| 136 | 35 | 409 | 1.8 | 671 | 2.9 | 262 | 407 | 676 | 268 |
| 132 | 32 | 413 | 1.0 | 683 | 1.8 | 269 | 406 | 683 | 276 |
| 131 | 31 | 412 | 1.1 | 685 | 2.6 | 273 | 408 | 687 | 280 |
| 138 | 36 | 439 | 3.1 | 660 | 1.0 | 221 | 441 | 665 | 224 |
| 130 | 30 | 410 | 1.9 | 676 | 1.0 | 265 | 408 | 681 | 273 |
| 135 | 34 | 414 | 3.4 | 687 | 1.9 | 272 | 408 | 690 | 281 |
| 144 | 39 | 407 | 1.5 | 0   | 0.0 | 0   | 409 | 0   | 0   |
| 140 | 37 | 412 | 0.6 | 661 | 0.8 | 248 | 415 | 667 | 252 |
| 142 | 38 | 408 | 1.2 | 651 | 1.7 | 242 | 410 | 656 | 245 |
| 134 | 33 | 398 | 0.9 | 683 | 1.2 | 285 | 390 | 683 | 293 |
| 137 | 35 | 0   | 0.0 | 669 | 1.7 | 0   | 0   | 675 | 0   |
| 133 | 32 | 415 | 0.6 | 685 | 3.9 | 270 | 407 | 683 | 276 |
| 139 | 36 | 417 | 2.9 | 660 | 1.0 | 243 | 419 | 665 | 246 |
| 141 | 37 | 407 | 3.7 | 656 | 1.0 | 249 | 409 | 661 | 252 |
| 136 | 34 | 410 | 1.9 | 674 | 0.6 | 264 | 408 | 678 | 270 |
| 132 | 31 | 414 | 0.5 | 684 | 1.1 | 269 | 407 | 683 | 277 |
| 138 | 35 | 416 | 0.8 | 674 | 0.7 | 258 | 419 | 680 | 262 |
| 131 | 30 | 405 | 1.4 | 664 | 5.0 | 258 | 398 | 664 | 266 |
| 135 | 33 | 415 | 8.1 | 682 | 1.4 | 266 | 409 | 685 | 275 |
| 140 | 36 | 417 | 1.4 | 661 | 1.3 | 243 | 419 | 666 | 247 |
| 142 | 37 | 410 | 1.9 | 656 | 1.5 | 245 | 413 | 661 | 248 |
| 134 | 32 | 419 | 1.2 | 705 | 2.0 | 286 | 412 | 705 | 293 |
| 137 | 34 | 379 | 2.0 | 670 | 0.9 | 290 | 379 | 676 | 298 |
| 139 | 35 | 418 | 0.7 | 675 | 1.1 | 257 | 422 | 682 | 260 |
| 143 | 37 | 404 | 3.6 | 0   | 0.0 | 0   | 406 | 0   | 0   |

|     |    |     |      |     |     |     |     |     |     |
|-----|----|-----|------|-----|-----|-----|-----|-----|-----|
| 141 | 36 | 401 | 7.7  | 657 | 0.9 | 255 | 403 | 661 | 259 |
| 133 | 31 | 416 | 0.6  | 683 | 3.8 | 266 | 408 | 681 | 273 |
| 136 | 33 | 408 | 3.5  | 674 | 0.7 | 265 | 404 | 679 | 275 |
| 132 | 30 | 404 | 1.5  | 662 | 1.7 | 257 | 396 | 660 | 264 |
| 138 | 34 | 384 | 0.7  | 671 | 0.8 | 286 | 388 | 679 | 292 |
| 142 | 36 | 412 | 11.4 | 659 | 1.7 | 247 | 414 | 664 | 250 |
| 140 | 35 | 419 | 1.4  | 670 | 1.5 | 251 | 422 | 676 | 254 |
| 135 | 32 | 418 | 2.9  | 681 | 1.9 | 262 | 412 | 682 | 270 |
| 137 | 33 | 421 | 1.1  | 670 | 1.0 | 248 | 423 | 678 | 255 |
| 134 | 31 | 412 | 5.9  | 704 | 2.6 | 291 | 405 | 704 | 299 |
| 139 | 34 | 385 | 0.5  | 674 | 0.8 | 289 | 391 | 683 | 293 |
| 141 | 35 | 394 | 0.6  | 659 | 1.2 | 265 | 395 | 663 | 268 |
| 136 | 32 | 416 | 0.9  | 0   | 0.0 | 0   | 412 | 0   | 0   |
| 138 | 33 | 423 | 0.3  | 0   | 0.0 | 0   | 429 | 0   | 0   |
| 142 | 35 | 394 | 0.5  | 654 | 0.8 | 259 | 396 | 659 | 263 |
| 140 | 34 | 411 | 1.6  | 668 | 1.2 | 257 | 415 | 676 | 260 |
| 135 | 31 | 423 | 1.5  | 704 | 3.0 | 281 | 418 | 706 | 288 |
| 137 | 32 | 421 | 3.1  | 0   | 0.0 | 0   | 420 | 0   | 0   |
| 141 | 34 | 394 | 1.1  | 662 | 1.6 | 267 | 396 | 667 | 272 |
| 138 | 32 | 420 | 4.8  | 698 | 5.2 | 277 | 426 | 711 | 285 |
| 139 | 32 | 424 | 3.9  | 703 | 8.0 | 279 | 433 | 717 | 285 |
| 138 | 31 | 402 | 5.5  | 695 | 2.7 | 293 | 404 | 707 | 303 |
| 140 | 32 | 431 | 3.9  | 677 | 2.8 | 246 | 439 | 690 | 251 |
| 141 | 32 | 431 | 2.8  | 677 | 2.3 | 246 | 436 | 687 | 251 |
| 139 | 31 | 396 | 2.0  | 694 | 3.9 | 298 | 404 | 710 | 307 |
| 142 | 32 | 434 | 2.4  | 678 | 2.3 | 243 | 437 | 686 | 249 |
| 140 | 31 | 416 | 4.9  | 656 | 6.2 | 239 | 425 | 671 | 246 |
| 141 | 31 | 426 | 1.3  | 674 | 2.7 | 248 | 432 | 686 | 254 |
